# Supplementary material for: Transcriptomic Analysis Reveals Functional Interaction of mRNA-lncRNA-miRNA in Trachinotus ovatus Infected by Cryptocaryon irritans
Source: MDPI journal article supplement (doi:10.3390/ijms242115886), 2023-11-01
Supplement: s1 [file s1]

**Table S1.** Sequences of primer sets used in this study.

| <b>RNA Type</b> | <b>Primer Name</b> | <b>Sequence(5'to3')</b> |
|-----------------|--------------------|-------------------------|
| mRNA            | IL8-F              | TCATTGCTGTGGTGGTGCT     |
|                 | IL8-R              | GCCTGTCTTTTTTCAGAGTGG   |
| mRNA            | CC19IL-F           | CAGGGACACTGGCGGAGAT     |
|                 | CC19IL-R           | GGGTTCGTTAGCAGGCACA     |
| mRNA            | tnnt3a-F           | GGATTGAGAAGCGTTCGTGC    |
|                 | tnnt3a-R           | CAGGTGACTGCTGTAGTTGGAG  |
| mRNA            | myosin7-F          | GGAGCAGAAAAAAGCAGTG     |
|                 | myosin7-R          | GCCAAGATGAACATTAGCCT    |
| mRNA            | TISSM-F            | CAAGTTCAAAAAGCCTGCC     |
|                 | TISSM-R            | GCCTCCACATTCTTACGCC     |
| mRNA            | myl13-F            | GCCAGAATCCCACCAATGC     |
|                 | myl13-R            | ACACCCTCAGACCCTCCACA    |
| mRNA            | AEBL-F             | ACAAGGACACCGAGGGGAT     |
|                 | AEBL-R             | GCCTGGCTCTTCAGTATGGA    |
| lncRNA          | Lnc-59819-F        | CTGTCTGTTTCTTTTCGTCC    |
|                 | Lnc-59819-R        | CCTGTTCCCTCATCTTCTCTCT  |
| lncRNA          | Lnc-59818-F        | GCCTTCAGTCTGTCTGTTTCTT  |
|                 | Lnc-59818-R        | GCCTGTTCCCTCATCTTCTCTC  |
| lncRNA          | Lnc-59828-F        | GGAAAGACAGGAAGTAACACG   |
|                 | Lnc-59828-R        | AGACAGACTGAAGGCGGAT     |
| lncRNA          | Lnc-59816-F        | CCTTCAGTCTGTCTGTTTCTT   |
|                 | Lnc-59816-R        | GCCTGTTCCCTCATCTTCTC    |
| lncRNA          | Lnc-00325-F        | GTTTGCTGGTGGTCGTGTT     |
|                 | Lnc-00325-R        | GGTTTTGGGTATTCTTGTCTCT  |
| microRNA        | Mir-101a-F         | CGGGCTACAGTACTGTGATA    |
| microRNA        | Mir-21-F           | CGGGCTAGCTTATCAGACTGG   |
| microRNA        | Mir-489-F          | CGGGCAGTGACATCATATGTA   |
| microRNA        | Mir-142a-5p-F      | CGGGCCATAAAGTAGAAAG     |
| microRNA        | UPM-R              | CAGCCACAAAAGAGCACAAT    |

**Table S2.** Sequences of stem-loop RT primer sets used in this study.

| <b>Primer Name</b> | <b>Sequence(5'to3')</b>                                       |
|--------------------|---------------------------------------------------------------|
| Mir-101a-RT        | CCTGTTGTCTCCAGCCACAAAAGAGCACAATATTTTCAGGAGACAACAGGCTTCA<br>GT |
| Mir-21-RT          | CCTGTTGTCTCCAGCCACAAAAGAGCACAATATTTTCAGGAGACAACAGGGCCAA<br>CA |
| Mir-489-RT         | CCTGTTGTCTCCAGCCACAAAAGAGCACAATATTTTCAGGAGACAACAGGGCAGC<br>CG |
| Mir-142a-5p-RT     | CCTGTTGTCTCCAGCCACAAAAGAGCACAATATTTTCAGGAGACAACAGGAGTAG<br>TG |
